# Supplementary material
Source: publisher figshare collection journal article supplement (https://acs.figshare.com/ndownloader/files/4759060)
Supplement: Supplementary file 1 [file 4759060]

#######################################################################
#
#                 Cambridge Crystallographic Data Centre
#                                CCDC 
#
#######################################################################
#
# If this CIF has been generated directly or indirectly from an entry in the 
# Cambridge Structural Database, then it will include bibliographic, chemical, 
# crystal, experimental, refinement or atomic coordinate data resulting from 
# the CCDC's data processing and validation procedures. Files generated from 
# CSD entries are Copyright 2006 Cambridge Crystallographic Data Centre. They 
# may be used in bona fide research applications only, and may not be copied or 
# further disseminated in any form, whether machine-readable or not, except for 
# the purposes of generating routine backup copies on your local computer 
# system.
# 
# Files arising from any other source may also contain material that is the 
# copyright of third parties, including the originator, and you should check 
# with the originator concerning the permitted uses of the information 
# contained in this CIF.
#
# For further information on the CCDC and the free tools enCIFer and Mercury
# for validating and visualising CIF files, please visit www.ccdc.cam.ac.uk
#
#######################################################################

data_knoe
_symmetry_cell_setting           orthorhombic
_symmetry_space_group_name_H-M   'P n a 21'
_symmetry_Int_Tables_number      33
loop_
_symmetry_equiv_pos_site_id
_symmetry_equiv_pos_as_xyz
1 x,y,z
2 -x,-y,1/2+z
3 1/2+x,1/2-y,z
4 1/2-x,1/2+y,1/2+z
_cell_length_a                   23.039(4)
_cell_length_b                   14.659(3)
_cell_length_c                   7.9911(11)
_cell_angle_alpha                90.00
_cell_angle_beta                 90.00
_cell_angle_gamma                90.00
_cell_volume                     2698.82
loop_
_atom_site_label
_atom_site_type_symbol
_atom_site_fract_x
_atom_site_fract_y
_atom_site_fract_z
K1 K 0.34969(3) 0.30909(4) 0.13134(13)
N1 N 0.36977(12) 0.12610(18) 0.2243(4)
N2 N 0.31897(13) 0.14855(19) 0.3041(4)
N3 N 0.31438(12) -0.00065(18) 0.2378(4)
C1 C 0.36489(14) 0.0366(2) 0.1874(5)
C2 C 0.28746(14) 0.0718(2) 0.3066(5)
C3 C 0.41013(14) -0.0120(2) 0.0971(5)
C4 C 0.45582(18) 0.0331(3) 0.0216(6)
C5 C 0.4984(2) -0.0166(3) -0.0560(7)
C6 C 0.49393(18) -0.1106(3) -0.0626(6)
N4 N 0.45030(14) -0.1564(2) 0.0058(6)
C7 C 0.40955(16) -0.1073(2) 0.0851(6)
C8 C 0.22882(14) 0.0683(2) 0.3761(5)
C9 C 0.19870(18) 0.1461(3) 0.4223(7)
C10 C 0.14293(17) 0.1375(3) 0.4837(7)
C11 C 0.11867(17) 0.0530(3) 0.4959(6)
N5 N 0.14596(12) -0.0232(2) 0.4501(5)
C12 C 0.19937(16) -0.0142(2) 0.3909(6)
O1 O 0.46994(10) 0.36646(16) 0.1118(5)
O2 O 0.42064(12) 0.25005(16) -0.1319(4)
O3 O 0.29662(12) 0.24329(17) -0.1679(4)
O4 O 0.22730(11) 0.30871(17) 0.0991(4)
O5 O 0.27831(12) 0.43651(18) 0.3126(4)
O6 O 0.39921(11) 0.41484(17) 0.3839(4)
C13 C 0.5027(2) 0.3086(3) 0.0056(8)
C14 C 0.4723(2) 0.2994(3) -0.1565(8)
C15 C 0.3905(2) 0.2303(4) -0.2838(7)
C16 C 0.3358(2) 0.1806(3) -0.2423(8)
C17 C 0.2445(2) 0.2002(3) -0.1124(8)
C18 C 0.2037(2) 0.2720(4) -0.0486(8)
C19 C 0.19495(19) 0.3855(3) 0.1611(7)
C20 C 0.21904(19) 0.4112(3) 0.3293(7)
C21 C 0.3031(2) 0.4494(4) 0.4730(7)
C22 C 0.3646(2) 0.4846(3) 0.4548(8)
C23 C 0.4584(2) 0.4425(3) 0.3709(8)
C24 C 0.4914(2) 0.3714(4) 0.2775(8)
H4 H 0.4601(18) 0.100(3) 0.036(7)
H5 H 0.5324(18) 0.009(3) -0.104(7)
H6 H 0.526(2) -0.150(3) -0.100(7)
H7 H 0.3768(15) -0.137(2) 0.140(6)
H9 H 0.2165(17) 0.205(3) 0.404(6)
H10 H 0.120(2) 0.191(3) 0.502(7)
H11 H 0.0794(15) 0.046(2) 0.547(5)
H12 H 0.2204(17) -0.068(3) 0.362(6)
H13A H 0.5405(18) 0.336(3) -0.024(6)
H13B H 0.5074(19) 0.249(3) 0.066(6)
H14A H 0.4965(19) 0.275(3) -0.228(6)
H14B H 0.464(2) 0.367(3) -0.195(7)
H15A H 0.415(2) 0.196(3) -0.367(10)
H15B H 0.3884(19) 0.288(3) -0.351(9)
H16A H 0.318(2) 0.150(4) -0.358(11)
H16B H 0.3408(19) 0.134(3) -0.147(8)
H17A H 0.225(2) 0.170(3) -0.223(7)
H17B H 0.250(2) 0.160(3) -0.014(8)
H18A H 0.203(2) 0.315(3) -0.139(9)
H18B H 0.164(2) 0.241(4) -0.014(9)
H19A H 0.1554(19) 0.368(3) 0.185(6)
H19B H 0.202(2) 0.435(4) 0.074(8)
H20A H 0.2141(17) 0.366(3) 0.411(7)
H20B H 0.1923(17) 0.463(3) 0.366(6)
H21A H 0.284(2) 0.491(4) 0.543(7)
H21B H 0.304(2) 0.395(3) 0.536(7)
H22A H 0.382(2) 0.491(3) 0.592(8)
H22B H 0.369(2) 0.535(4) 0.360(8)
H23A H 0.4738(18) 0.448(3) 0.490(7)
H23B H 0.4582(19) 0.508(3) 0.303(8)
H24A H 0.533(3) 0.387(3) 0.280(9)
H24B H 0.491(3) 0.312(4) 0.333(10)
K1 K 0.15031 -0.19091 0.63134
N5 N 0.35404 0.4768 -0.0499

#END
